# Supplementary material
Source: PubMed Central journal article supplement (PMC6325171)
Supplement: d0fc9a9137ccd0ce247897d74270cbb2_AAC.01316-18-s0001.pdf [file d0fc9a9137ccd0ce247897d74270cbb2_AAC.01316-18-s0001.pdf]

**Table S1.** List of bacterial strains and plasmids used in this study.

| Name                                            | Description/genotype                                                                                                                              | Marker | Reference                                  |
|-------------------------------------------------|---------------------------------------------------------------------------------------------------------------------------------------------------|--------|--------------------------------------------|
| <b>Strains</b>                                  |                                                                                                                                                   |        |                                            |
| <i>M. abscessus</i> S                           | <i>Mabs sensu stricto</i> , strain CIP104536 <sup>T</sup> , smooth                                                                                | –      | Laboratoire de Référence des Mycobactéries |
| <i>M. abscessus</i> R                           | <i>Mabs sensu stricto</i> , strain CIP104536 <sup>T</sup> , rough                                                                                 | –      | Laboratoire de Référence des Mycobactéries |
| <i>M. abscessus</i> S                           | <i>Mabs sensu stricto</i> , strain ATCC 19977, smooth                                                                                             | –      | ATCC                                       |
| CFZ-R1                                          | <i>M. abscessus</i> S harboring the L40W mutation in MAB_2299c, co-resistant to CFZ/BDQ                                                           | –      | This study                                 |
| CFZ-R3                                          | <i>M. abscessus</i> S harboring a c276 deletion leading to a P92 frameshift mutation in MAB_2299c, co-resistant to CFZ/BDQ                        | –      | This study                                 |
| CFZ-R4                                          | <i>M. abscessus</i> S harboring a g541t substitution leading to an early stop codon in position E181 in MAB_2299c, co-resistant to CFZ/BDQ        | –      | This study                                 |
| CFZ-R6                                          | <i>M. abscessus</i> S harboring a 318a insertion leading to a D106 frameshift mutation in MAB_2299c, co-resistant to CFZ/BDQ                      | –      | This study                                 |
| CFZ-R7                                          | <i>M. abscessus</i> S harboring the L151P mutation in MAB_2299c, co-resistant to CFZ/BDQ                                                          | –      | This study                                 |
| CFZ-R9                                          | <i>M. abscessus</i> S harboring the G215S mutation in MAB_2299c, co-resistant to CFZ/BDQ                                                          | –      | This study                                 |
| $\Delta$ MAB_2299c                              | <i>Mabs</i> MAB_2299c unmarked deletion mutant obtained by two-step homologous recombination in the smooth parental strain CIP104536 <sup>T</sup> | –      | This study                                 |
| $\Delta$ MAB_2299c.C                            | $\Delta$ MAB_2299c complemented with pMV261-MAB_2299c                                                                                             | Kan    | This study                                 |
| $\Delta$ MAB_2299c / $\Delta$ MAB_2300-MAB_2301 | $\Delta$ MAB_2299c in which $\Delta$ MAB_2300-2301 have been deleted by two-step homologous recombination.                                        | –      | This study                                 |
| <i>E. coli</i> XL1 Blue                         | <i>endA1 gyrA96 recA1 thi-1 relA1 hsdR17 supE44 lac [F' proAB lacIq<math>\Delta</math>M15 Tn10 (Tetr)]</i> .                                      | Tet    | Stratagene                                 |
| <i>E. coli</i> BL21 (DE3) (pRARE2)              | <i>gal dcm (DE3) F- ompT hsdSB(rB- mB-)</i> transformed by our hand with the pRARE2 vector (CamR)                                                 | Cam    | New England Biolabs                        |
| <b>Plasmids</b>                                 |                                                                                                                                                   |        |                                            |

|                             |                                                                                                                                                                                                                               |          |           |
|-----------------------------|-------------------------------------------------------------------------------------------------------------------------------------------------------------------------------------------------------------------------------|----------|-----------|
| pET32a                      | Vector for high-level expression of proteins fused with an N-terminal thioredoxin protein and a 6×His tag.                                                                                                                    | Amp      | Novagen   |
| pET32a-MAB_2299c            | pET32a in which MAB_2299c is cloned in fusion with the thioredoxin/His tag sequence and containing a TEV cleavage site before MAB_2299c to remove the tags.                                                                   | Amp      | This work |
| pET32a-MAB_2299c_L40W       | pET32a into which the MAB_2299c_L40W gene is cloned.                                                                                                                                                                          | Amp      | This work |
| pUX1                        | Vector for targeted disruption through homologous integration, containing the brightly red fluorescent tdTomato marker for positive selection.                                                                                | Kan, Hyg | (1)       |
| pUX1-katG                   | Variant of pUX1 containing the <i>katG</i> gene of <i>M. tuberculosis</i> H37Rv as a counter-selectable marker in the presence of isoniazid and used for the generation of unmarked chromosomal alterations.                  | Kan, Hyg | This work |
| pUX1-katG-MAB_2299c         | Variant of pUX1-katG containing adjacently cloned up- and downstream sequences (approximately 1 kb each) of the MAB_2299c open reading frame. Used to generate an unmarked deletion of MAB_2299c in <i>M. abscessus</i> .     | Kan      | This work |
| pUX1-katG-MAB_2300-MAB_2301 | Variant of pUX1-katG containing adjacently cloned up- and downstream sequences (approximately 0.5 kb each) of the MAB_2300-2301 operon. Used to generate an unmarked deletion of MAB_2300 and MAB_2301 in $\Delta$ MAB_2299c. | Kan      | This work |
| pMV261                      | Multi-copy vector enabling the cloning into <i>E. coli</i> and the overexpression of genes under the control of the strong and constitutive <i>hsp60</i> promoter in mycobacteria.                                            | Kan      | (2)       |
| pMV261-AflII                | pMV261 vector where an AflII restriction site was inserted within the multi-cloning site.                                                                                                                                     | Kan      | (1)       |
| pMV261-MAB_2299c            | pMV261 overexpressing the TetR MAB_2299c under the control of the <i>hsp60</i> promoter.                                                                                                                                      | Kan      | This work |

Amp, ampicillin; Kan, kanamycin; Tet, Tetracycline; Stp, streptomycin ; Cam, chloramphenicol.

## References

1. Viljoen A, Gutiérrez, Ana Victoria, Dupont C, Ghigo E, Kremer L. 2018. A simple and rapid gene disruption strategy in *Mycobacterium abscessus*: on the design and application of glycopeptidolipid mutants. *Front Cell Infect Microbiol* 8:69.
2. Stover CK, de la Cruz VF, Fuerst TR, Burlein JE, Benson LA, Bennett LT, Bansal GP, Young JF, Lee MH, Hatfull GF. 1991. New use of BCG for recombinant vaccines. *Nature* 351:456–460.

**Table S2:** Oligonucleotides used in this study. Fw and Rv stand for forward and reverse, respectively.

| Primers                                                         | 5' to 3' sequence                                           |
|-----------------------------------------------------------------|-------------------------------------------------------------|
| <b>Cloning in pET32a</b>                                        |                                                             |
| <i>MAB_2299c_Fw</i> (KpnI)<br>(TEV Cleavage Site)               | TATAGGTACCGAGAATCTGTACTTCCAGGGAGTGCGCAACTGACATTCCAACGCG     |
| <i>MAB_2299c_Rv</i> (HindIII)                                   | TCGTAAGCTTTTGGTTCGCCAGGCGTACACGCGG                          |
| <b>Cloning in pMV261</b>                                        |                                                             |
| <i>Compl_MAB_2299c_Fw</i>                                       | CGCAACTGACATTCCAACGCGC                                      |
| <i>Compl_MAB_2299c_Rv</i> (HindIII)                             | GAGAGAAAGCTTTTCTGGTGCACGTGAGAGTG                            |
| <b>Generation of pUX1-<i>katG</i> and derivative constructs</b> |                                                             |
| <i>katG_outer_Fw</i>                                            | TATACCGGACTACGCCGAAC                                        |
| <i>katG_outer_Rev</i> (AvrII)                                   | GAGAGACCTAGGTGCATGAGCATTATCCCGTA                            |
| <i>katG_inner_Fw</i>                                            | CCGGAGCCGCCAGCAACGGCT                                       |
| <i>katG_inner_Rev</i>                                           | AGCCGTTGCTGGCGGCTCCGG                                       |
| <i>MAB_2299c_outer_Fw</i>                                       | GAAGAACAGCAGCATCACGA                                        |
| <i>MAB_2299c_outer_Rev</i> (NheI)                               | GAGAGAGCTAGCGACACCTTCGTTACGGTTT                             |
| <i>MAB_2299c_inner_Fw</i>                                       | AAAGAAGCGTCGCTCTGACCAGGCTGTTA                               |
| <i>MAB_2299c_inner_Rev</i>                                      | GGTCAGAGCGACGCTTCTTTTCGTCAGTCC                              |
| <i>MAB_2300-MAB_2301_outer_Fw</i>                               | ACGCCTTAGCTTTTCCGTTT                                        |
| <i>MAB_2300-MAB_2301_outer_Rev</i> (NheI)                       | GAGAGAGCTAGCGCAGATGTCAACAACCGATG                            |
| <i>MAB_2300-MAB_2301_inner_Fw</i>                               | TTGGATCCCGCAGCTCCGATCCGCGTGGT                               |
| <i>MAB_2300-MAB_2301_inner_Rev</i>                              | ATCGGAGCTGCGGGATCCAAGCCCCTTC                                |
| <b>PCR confirmation of <i>MAB_2299</i> knock-out</b>            |                                                             |
| <i>MAB_2299c_U_scrn_Fw</i>                                      | GAAGATCGCGTAGTCGGTTC                                        |
| <i>MAB_2299c_U_scrn_Rev</i>                                     | ATCACCACAGATGACCCACA                                        |
| <i>MAB_2299c_D_scrn_Fw</i>                                      | CGCGTTTCATCAGGATCTTT                                        |
| <i>MAB_2299c_D_scrn_Rev</i>                                     | CTTTGGAGCATGGGCATATT                                        |
| <i>MAB_2300-MAB_2301_U_scrn_Fw</i>                              | ATCACCACAGATGACCCACA                                        |
| <i>MAB_2300-MAB_2301_U_scrn_Rev</i>                             | GTGCAGGAATTCTCATGCTG                                        |
| <i>MAB_2300-MAB_2301_D_scrn_Fw</i>                              | GGAATCCGATCGGTAGTTGA                                        |
| <i>MAB_2300-MAB_2301_D_scrn_Rev</i>                             | CGCTCATGCCGATTTCTTAG                                        |
| <b>Sequencing</b>                                               |                                                             |
| <i>pMV5'</i>                                                    | CGCCCGGCCAGCGTAAGTAGC                                       |
| <i>pMV3'</i>                                                    | GCCTGGCAGTCGATCGTACG                                        |
| <i>pMV3' Ext</i>                                                | TTGAGACACAACGTCGCTTT                                        |
| <i>NhelpUX1</i>                                                 | ACGGCATGGACGAGCTGTAC                                        |
| <b>qRT-PCR</b>                                                  |                                                             |
| <i>sigA</i>                                                     | Fw: CACATGGTCGAGGTCATCAA<br>Rev: TGGATTTCCAGCACCTTCTC       |
| <i>MAB_3551c (tgs1)</i>                                         | Fw: CACCGTCTACTACGGAATCAAC<br>Rev: TGCGCAGCCTCCAATAAT       |
| <i>MAB_2300</i>                                                 | Fw: GAGAAGCATGACCGACGACAAA<br>Rev: CACACCCTTCTTGTCGATGTAGTT |
| <i>MAB_2301</i>                                                 | Fw: CAGCTCCATCCCATTCTTATC<br>Rev: TCGGCCTGGACCTTCATA        |
| <i>MAB_2302</i>                                                 | Fw: GAGATATTCGGCTCCACCAACATC                                |

|                                                    |                                                                      |
|----------------------------------------------------|----------------------------------------------------------------------|
|                                                    | Rev: CACAGATAGTTCACCTCACCCCTTGT                                      |
| <i>MAB_2303</i>                                    | Fw: ACATTCTCTGTCCCGATCATT<br>Rev: GTGCTCTTTACCGACCTCTTC              |
| <b>Electrophoretic Mobility Shift Assay (EMSA)</b> |                                                                      |
| <i>Probe A_Fw</i>                                  | GTGCGTAACGCACGCTACCGGGTGGTTCGTTGGCTCGCAAATCAC<br>ACGCCGTGCGTTATCCTCG |
| <i>Probe A_Rv</i>                                  | CACGCATTGCGTGCGATGGCCACCAAGCAACCGAGCGTTTAGTG<br>TGCGGCACGCAATAGGAGC  |
| <i>Probe B_Fw</i>                                  | CAGCTCCGATCCGCGTGGTGTCTGG                                            |
| <i>Probe B_Rv</i>                                  | GCTAATTCTCAATGGTGGCGATGCC                                            |
| <i>Probe C_Fw</i>                                  | TCGCCGCTAGTGGTGACGAACGAC                                             |
| <i>Probe C_Rv</i>                                  | TCAGGGAAGTGTACATGTGTCTGC                                             |
| <i>Probe D_Fw</i>                                  | GCTTGTAGCTAACTAGGCTATTGC                                             |
| <i>Probe D_Rv</i>                                  | GACTAGTGGGATCCATACCCGCGT                                             |
| <i>Non-specific probe_Fw</i>                       | CACTTCGCCATAAGTGGATTGACTCTATCCACTTTTACCCATAGA                        |
| <i>Non-specific probe_Rv</i>                       | TCTATGGGTAAAAGTGGATAGAGTCAATCCACTTATGGCGAAGTG                        |
| <i>ΔPalin_Fw</i>                                   | GTGCGGCTACTTACCTACCGGGTGGTTCGTTGGCTCGCAAATCAC<br>ACGCTCGCACGAGTCCTCG |
| <i>ΔPalin_Rv</i>                                   | CACGCCGATGAATGGATGGCCACCAAGCAACCGAGCGTTTAGT<br>GTGCGAGCGTGCTCAGGAGC  |
| <i>ΔDR_Fw</i>                                      | GTGCGTAACGCACGCTTGATATACTGCTTAAGGCTCGCAAATCCT<br>GACTTAGTGACCTTCCTCG |
| <i>ΔDR_Rv</i>                                      | CACGCATTGCGTGCGAACTATATGACGAATCCGAGCGTTTAGGA<br>CTGAATCACTGGAAGGTCG  |

<sup>a</sup>Restriction sites are underlined and specified inside brackets.

**Table S3.** Drug susceptibility profile of *M. abscessus* CIP104536 and its various derivatives to IPM, BDQ, CFZ, INH, EMB or RIF. MIC<sub>99</sub> (µg/ml) were visually determined on Middlebrook 7H10 agar after 4 days at 37°C.

| Strain                                 | MIC (µg/mL) |       |     |      |     |     |
|----------------------------------------|-------------|-------|-----|------|-----|-----|
|                                        | IPM         | BDQ   | CFZ | INH  | EMB | RIF |
| CIP104536                              | 4           | 0.25  | 2   | >256 | 16  | 128 |
| <i>ΔMAB_2299c</i>                      | 4           | 1     | 8   | >256 | 16  | 128 |
| <i>ΔMAB_2299c.C</i>                    | 4           | 0.25  | 2   | >256 | 16  | 128 |
| <i>ΔMAB_2299c / ΔMAB_2300-MAB_2301</i> | 4           | 0.031 | 2   | ND   | ND  | ND  |

IPM, imipenem; BDQ, bedaquiline; CFZ, clofazimine; INH, isoniazid; EMB, ethambutol; RIF, rifampicin. ND, not determined.

**Table S4.** Percentage of nucleotide or protein sequence identity (ID) between seventeen identified *M. abscessus* *mmpS*-*mmpL* couples and the *M. tuberculosis* *mmpS5*-*mmpL5* couple after multiple alignment using the MUSCLE algorithm.

| MmpS/MmpL                              | Nucleotide ID <sup>a</sup> | MmpS ID   | MmpL ID             |
|----------------------------------------|----------------------------|-----------|---------------------|
| <b>Rv0677c-Rv0676c</b>                 | 100                        | 100       | 100                 |
| <b>MAB_0477-MAB_0478</b>               | 75                         | 35        | 44                  |
| <b>MAB_0988c-MAB_0987c</b>             | 79                         | 46        | 57                  |
| <b>MAB_1135c-MAB_1134c</b>             | 80                         | 49        | 60                  |
| <b>MAB_2036-MAB_2037</b>               | 75                         | 38        | 52                  |
| <b>MAB_2211c-MAB_2210c</b>             | 73                         | 36        | 38                  |
| <b>MAB_2300-MAB_2301</b>               | <b>80</b>                  | <b>49</b> | <b>62</b>           |
| <b>MAB_2302-MAB_2303</b>               | <b>77</b>                  | <b>47</b> | <b>54</b>           |
| <b>MAB_2572c-MAB_2571c</b>             | 75                         | 41        | 20                  |
| <b>MAB_2649-MAB_2650</b>               | 77                         | 41        | 52                  |
| <b>MAB_3149-MAB_3150</b>               | 80                         | 54        | 61                  |
| <b>MAB_3200-MAB_3201</b>               | 73                         | 35        | 42                  |
| <b>MAB_3563c-MAB_3562c</b>             | 77                         | 38        | 51                  |
| <b>MAB_4117c-MAB_4115c<sup>b</sup></b> | 36                         | 48        | 61, 59 <sup>b</sup> |
| <b>MAB_4262-MAB_4263</b>               | 72                         | 27        | 38                  |
| <b>MAB_4311c-MAB_4310c</b>             | 78                         | 50        | 54                  |
| <b>MAB_4383c-MAB_4384c</b>             | <b>82</b>                  | <b>61</b> | <b>68</b>           |
| <b>MAB_4705c-MAB_4703c<sup>b</sup></b> | 35                         | 51        | 60, 62 <sup>b</sup> |

<sup>a</sup>For nucleotide alignments and ID calculations, the sequence starting at the start codon of the *mmpS* gene and ending at the stop codon of the *mmpL* gene was used.

<sup>b</sup>*mmpS/mmpL* couples containing an additional *mmpL* in the operon. For MmpL protein sequence identity to MmpL5<sub>Mtb</sub> the % ID of the first MmpL is shown first followed by a comma and then the % ID of the second MmpL.

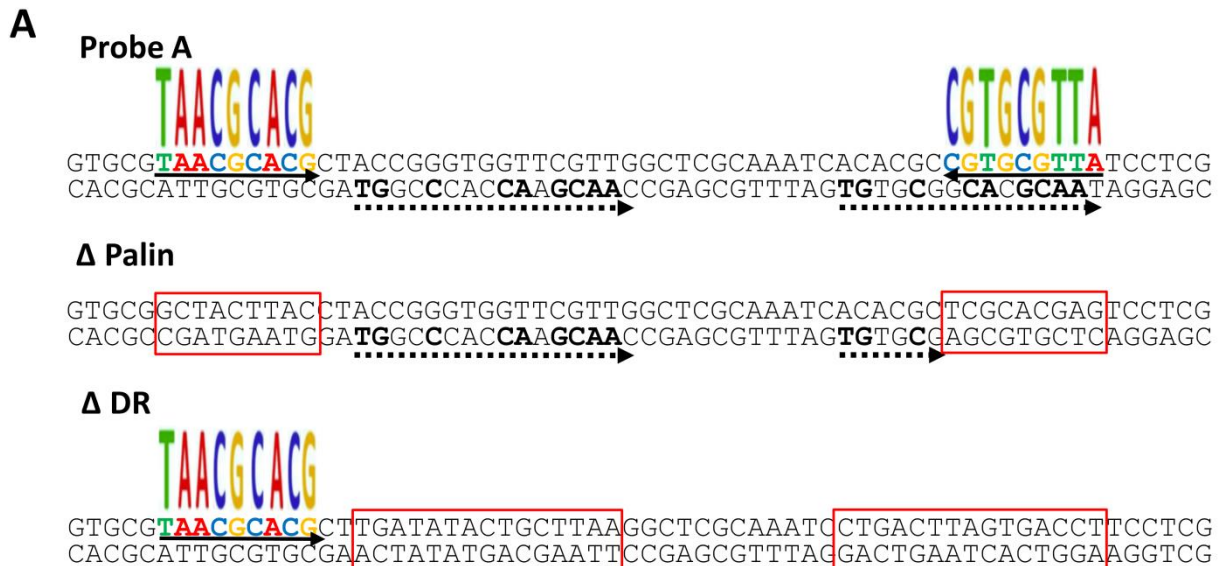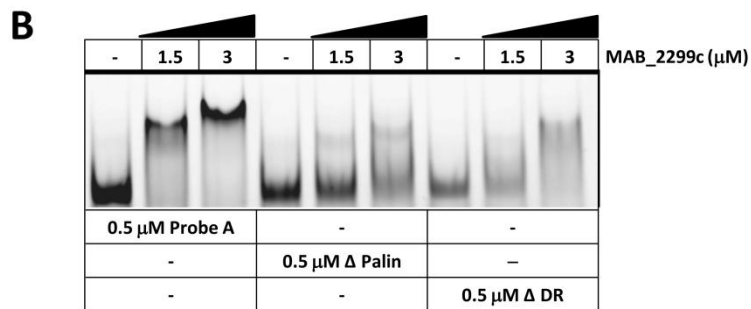

**Fig. S1. Binding activity of MAB\_2299c to mutated Probe A. (A)** DNA sequences of Probe A and its two mutated derivatives, ΔPalin and ΔDR, where the conserved palindromes and the degenerated double repeats were replaced by random nucleotides, respectively. Conserved residues are in color for the palindromes and in bold for the double repeats. **(B)** EMSA using the Probes A, ΔPalin and ΔDR with purified MAB\_2299c. Gel Shifts were revealed by fluorescence emission using the corresponding 5' fluorescein-labeled probes.



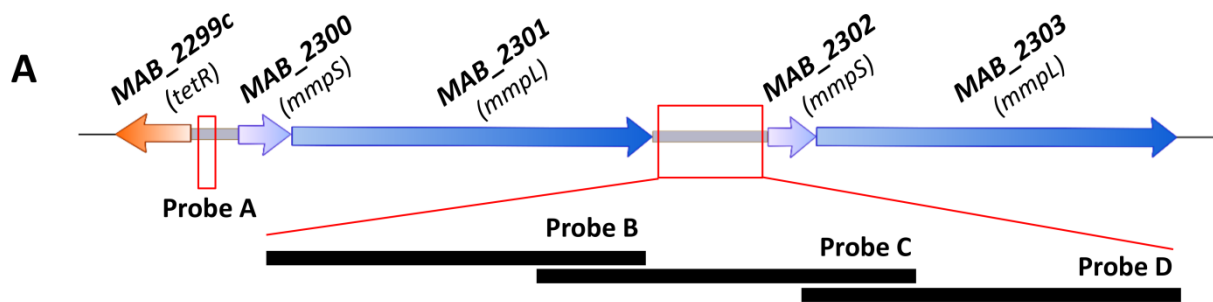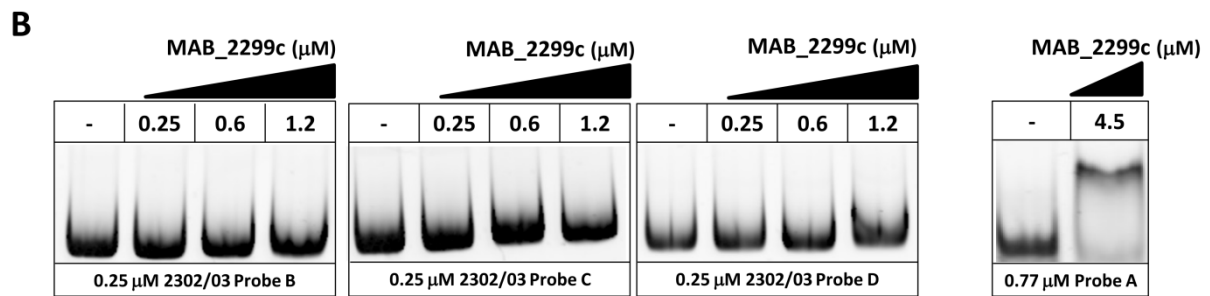

**Fig. S2. (A)** Schematic representation of the intergenic region  $IR_{2302/03}$  present upstream of *MAB\_2302/MAB\_2303*. Due to its large size, this 893 bp region was divided into three 373 bp overlapping probes (Probes B – C – D). **(B)** EMSA using increasing concentrations of purified MAB\_2299c with Probe A (left panel), Probe B (middle panel) or Probe C (right panel). Probe A was also included as a positive control (far right panel). Gel shifts were revealed by fluorescence emission using 5' fluorescein-labeled probes. Experiments were repeated three times with similar results.

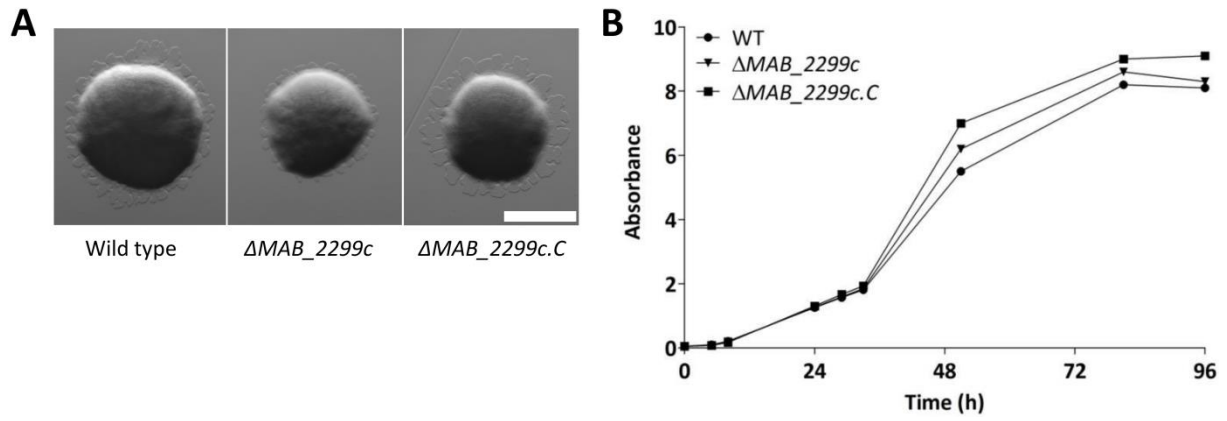

**Fig. S3.** Colony morphology **(A)** and *in vitro* growth **(B)** of parental *M. abscessus* WT CIP104536<sup>T</sup>,  $\Delta MAB_{2299c}$  and its complemented derivative  $\Delta MAB_{2299c.C}$ . Bacteria were grown in 7H9 broth supplemented with OADC and 0.05% Tween 80. Growth was monitored by determining the OD<sub>600</sub> at different time points. Scale bar corresponds to 150  $\mu$ m.
